# Supplementary material for: An international comparison of occupational health guidelines for the management of mental disorders and stress-related psychological symptoms
Source: HighWire-hosted journal article supplement (doi:10.1136/oemed-2013-101626), 2014-11-18
Supplement: oemed-2013-101626supp2.pdf [file oemed-2013-101626supp2.pdf]

**Supplemental file 2.** Inclusion process guidelines via experts (Organizations that were contacted; their answers to the question if guidelines were available that focus on mental health problems at work; in which language these guidelines were available; and, whether or not the guideline was included in this review).

| Country              | Organization                                                                                                                                                                                                                                                                     | Guideline available?                                                                           | In which language? | Included in the review?                                                         |
|----------------------|----------------------------------------------------------------------------------------------------------------------------------------------------------------------------------------------------------------------------------------------------------------------------------|------------------------------------------------------------------------------------------------|--------------------|---------------------------------------------------------------------------------|
| UK                   | - The Society of Occupational Medicine<br>- International Institute of Risk and Safety Management                                                                                                                                                                                | Yes                                                                                            | English            | Yes                                                                             |
| Netherlands          | - Nederlandse Vereniging voor Arbeids- en<br>Bedrijfsgezondheidskunde (NVAB)<br>- Stichting Arbeid Netherlands                                                                                                                                                                   | Yes                                                                                            | Dutch              | Yes                                                                             |
| Italy                | - Italian Society of Occupational Medicine and Industrial<br>Hygiene (SIMLII)<br>- Associazione Italiana di Radioprotezione Medica (AIRM)<br>- Fondazione Salvatore Maugeri Italy<br>- Italian Workers' Compensation Authority (INAIL)<br>- Clinica del Lavoro "L. Devoto" Italy | No (not specifically for<br>mental disorders but<br>focusing on work disability<br>in general) |                    |                                                                                 |
| Finland              | - The Finnish Work Environment Fund<br>- The Finnish Association of Occupational Health Nurses<br>(FAOHN)<br>- Finnish Institute of Occupational Health                                                                                                                          | Yes                                                                                            | Finnish            | Yes                                                                             |
| Japan                | - Japan Society for Occupational Health<br>- The Promotion Foundation of OH<br>- University of Occupational & Environmental Health<br>Japan                                                                                                                                      | Yes                                                                                            | Japanese           | Yes                                                                             |
| Sweden               | - Prevent Sweden                                                                                                                                                                                                                                                                 | Did not provide information                                                                    |                    |                                                                                 |
| USA                  | - American Board for Occupational Health Nurses<br>(ABOHN)<br>- The American Association of Occupational Health<br>Nurses Inc. (AAOHN)<br>- The National Institute for Occupational Safety and<br>Health                                                                         | Yes                                                                                            | English            | No, not primary focused on mental disorders<br>or occupational health outcomes. |
| Brazil               | - Fundacentro                                                                                                                                                                                                                                                                    | Did not provide information                                                                    |                    |                                                                                 |
| Republic of<br>Korea | - Korea Occupational Safety & Health Agency                                                                                                                                                                                                                                      | Yes                                                                                            | Korean             | Yes                                                                             |

| Country                   | Organization                                                                                                                     | Guideline available?        | In which language? | Included in the review?                                                                          |
|---------------------------|----------------------------------------------------------------------------------------------------------------------------------|-----------------------------|--------------------|--------------------------------------------------------------------------------------------------|
| France                    | - Institut National de Recherche et de Sécurité pour la prévention des accidents du travail et des maladies professionnelles     | Did not provide information |                    |                                                                                                  |
| Germany                   | - Bundesanstalt für Arbeitsschutz und Arbeitsmedizin (BAuA)                                                                      | Yes                         | German             | No, document did not meet criteria to be considered a guideline                                  |
| Czech Republic            | - Czech society of Occupational Medicine                                                                                         | Yes                         | English            | No, document did not meet criteria to be considered a guideline                                  |
| Thailand                  | - Thai Bureau of Occupational and Environmental Diseases                                                                         | No                          |                    |                                                                                                  |
| Croatia                   | - Croatian society on Occupational Health                                                                                        | No                          |                    |                                                                                                  |
| Canada                    | - Canadian Occupational Health Nurses Association Inc<br>- Institut de recherche Robert-Sauvé en santé et en sécurité du travail | Yes / Yes                   | English / French   | No, not primary focused on the management of patients with mental disorders in relation to work. |
| Argentina                 | - Sociedad de Medicina del Trabajo de la Provincia de Buenos Aires                                                               | Did not provide information |                    |                                                                                                  |
| South-Africa              | - South African Society of Occupational Medicine (SASOM)                                                                         | Yes                         | English            | No, not primary focused on the management of patients with mental disorders in relation to work. |
| Belgium                   | - Flemish Organization of Nurses Working in Occupational Health                                                                  | No                          |                    |                                                                                                  |
| Portugal                  | - Sociedade Portuguesa de Medicina do Trabalho                                                                                   | No                          |                    |                                                                                                  |
| India                     | - Indian Association of Occupational Health                                                                                      | No                          |                    |                                                                                                  |
| Philippines               | - Philippine College of Occupational Medicine (PCOM)                                                                             | Did not provide information |                    |                                                                                                  |
| Australia/<br>New Zealand | - Australian and New Zealand Society of Occupational Medicine                                                                    | Yes                         | English            | No, , document did not meet criteria to be considered a guideline.                               |
